# Supplementary material for: Complex transition metal hydrides: linear correlation of countercation electronegativity versus T–D bond lengths
Source: Royal Society of Chemistry journal article supplement (doi:10.1039/c5cc03654b), 2015-01-01
Supplement: c5cc03654b1.pdf [file c5cc03654b1.pdf]

## Supporting information

Belonging to the manuscript

### Complex transition metal hydrides: linear correlation of counteranion electronegativity versus T–D bond lengths

T. D. Humphries\*, D. A. Sheppard and C. E. Buckley

Hydrogen Storage Research Group, Fuels and Energy Technology Institute, Department of Physics, Astronomy and Medical Radiation Sciences, Curtin University, GPO Box U1987, Perth, WA 6845, Australia. Fax: +61 8 9266 2377; Tel: +61 8 9266 1381.

E-mail: [terry\\_humphries81@hotmail.com](mailto:terry_humphries81@hotmail.com)

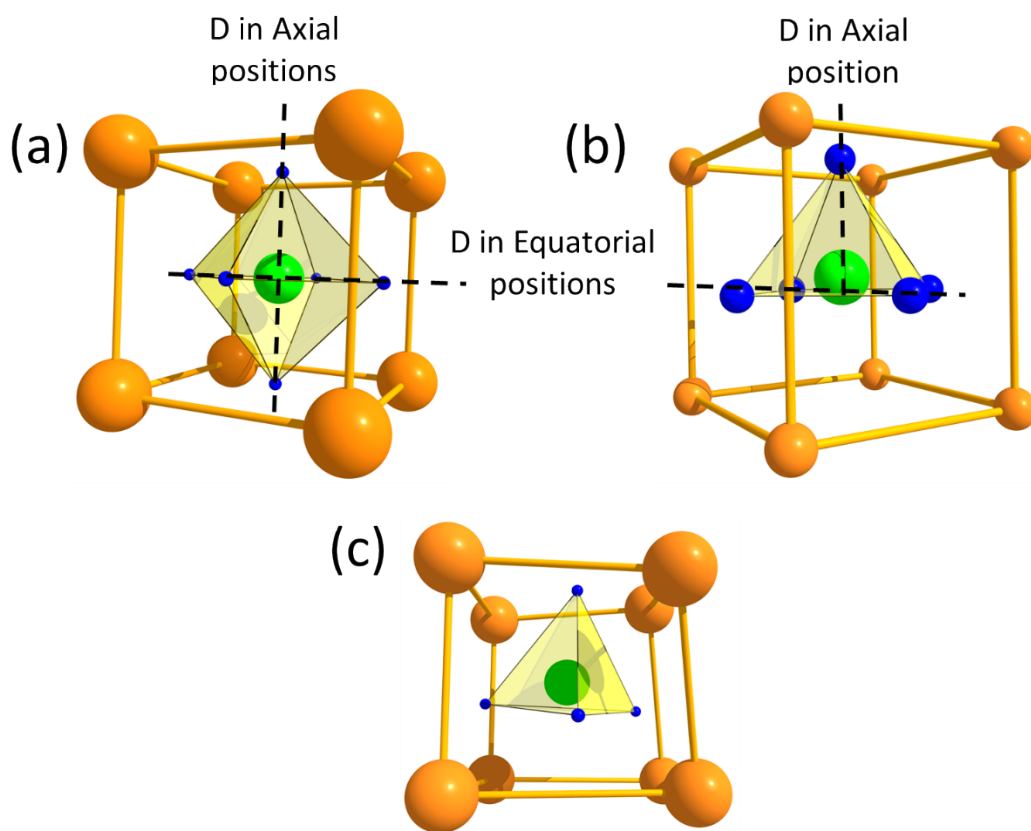

**Fig. S1.** Geometries of the  $[TD_6]^{4-}$  ( $T = \text{Fe, Ru}$ ) (a),  $[\text{CoD}_5]^{4-}$  (b) and  $[\text{NiD}_4]^{4-}$  (c) systems, emphasising the equatorial and axial positions of the D atoms. Blue spheres illustrate D positions; orange spheres indicate Mg and green spheres indicate T ( $T = \text{Fe, Ru, Co, Ni}$ ).
